# Supplementary material for: Effects of Silver Nanoparticles on Physiological and Proteomic Responses of Tobacco (Nicotiana tabacum) Seedlings Are Coating-Dependent
Source: MDPI journal article supplement (doi:10.3390/ijms232415923), 2022-12-14
Supplement: s1 [file s1]

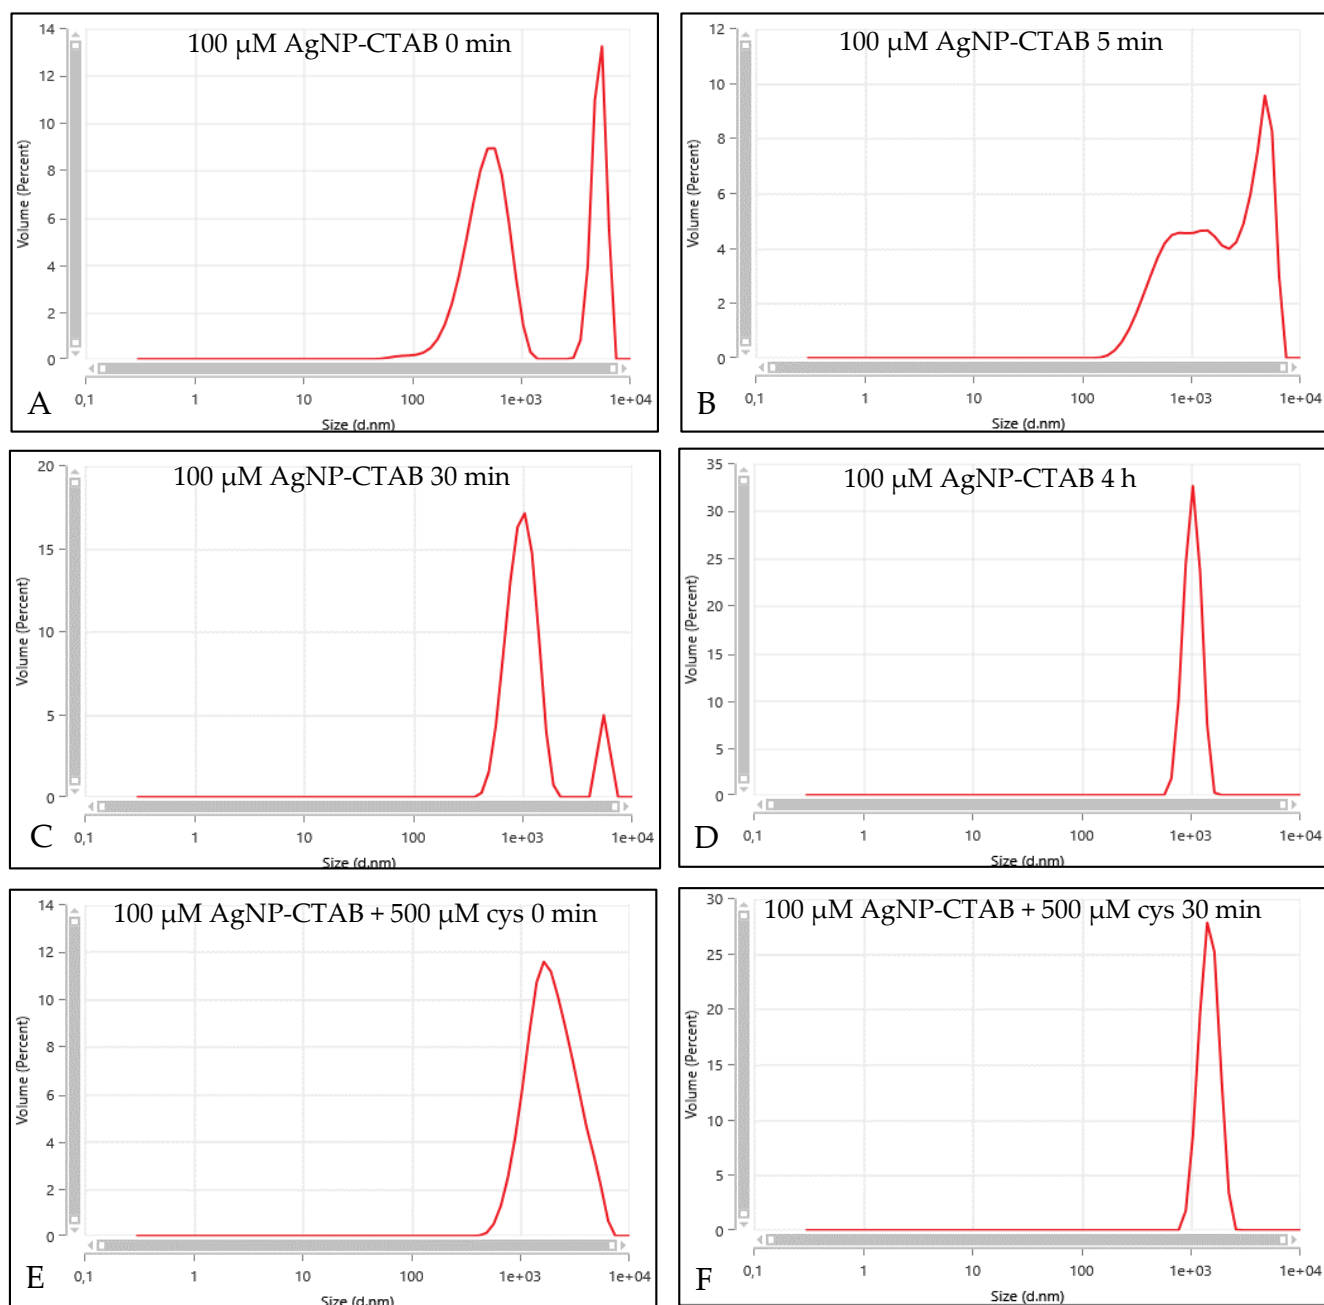

**Figure S4.** Temporal changes in hydrodynamic diameter of 100  $\mu\text{M}$  AgNP-CTAB alone after the addition into liquid  $\frac{1}{2}$  strength MS medium; in the beginning of the measurement (A), after five minutes (B), after 30 minutes (C), and after four hours (D); after the addition of 500  $\mu\text{M}$  of cysteine (cys), in the beginning of the measurement (E), and after 30 minutes (F).
