# Supplementary material for: Effects of Silver Nanoparticles on Physiological and Proteomic Responses of Tobacco (Nicotiana tabacum) Seedlings Are Coating-Dependent
Source: MDPI journal article supplement (doi:10.3390/ijms232415923), 2022-12-14
Supplement: s1 [file s1]

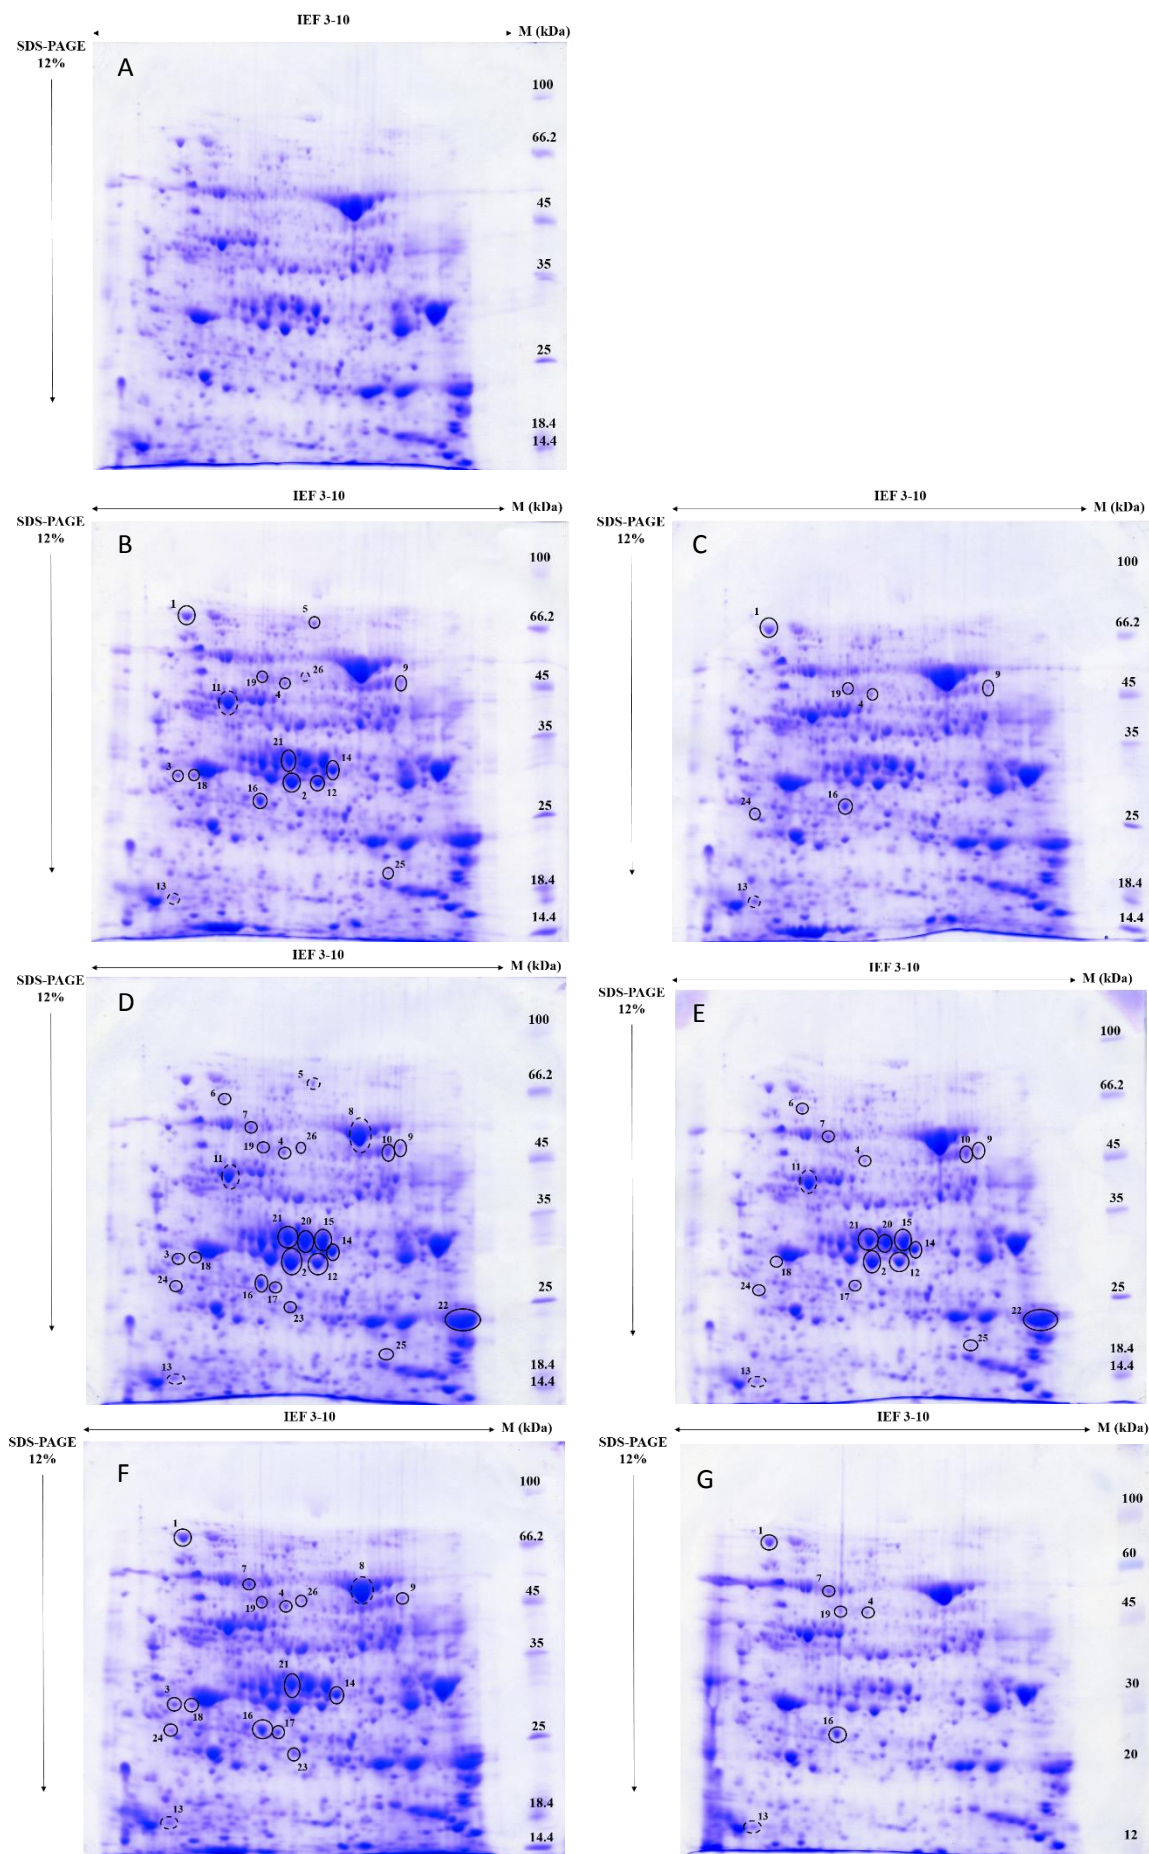

**Figure S5.** Proteome profiles of control seedlings (A) and seedlings treated with 100  $\mu$ M AgNP-PVP (B), 100  $\mu$ M AgNP-PVP and 500  $\mu$ M cysteine (C), 100  $\mu$ M AgNP-CTAB (D), 100  $\mu$ M AgNP-CTAB and 500  $\mu$ M cysteine (E), 100  $\mu$ M AgNO<sub>3</sub> (F) and 100  $\mu$ M AgNO<sub>3</sub> and 500  $\mu$ M cysteine (G) obtained after 2-DE analysis. Differently abundant proteins (at least 1.5-fold compared to the control) are indicated by circles; upregulated proteins are indicated by black line, while down-regulated proteins are indicated with broken-lined circles. The numbers correspond to the numbers listed in Table 2. M, molecular weight markers
