# Supplementary material for: Effects of Silver Nanoparticles on Physiological and Proteomic Responses of Tobacco (Nicotiana tabacum) Seedlings Are Coating-Dependent
Source: MDPI journal article supplement (doi:10.3390/ijms232415923), 2022-12-14
Supplement: s1 [file s1]

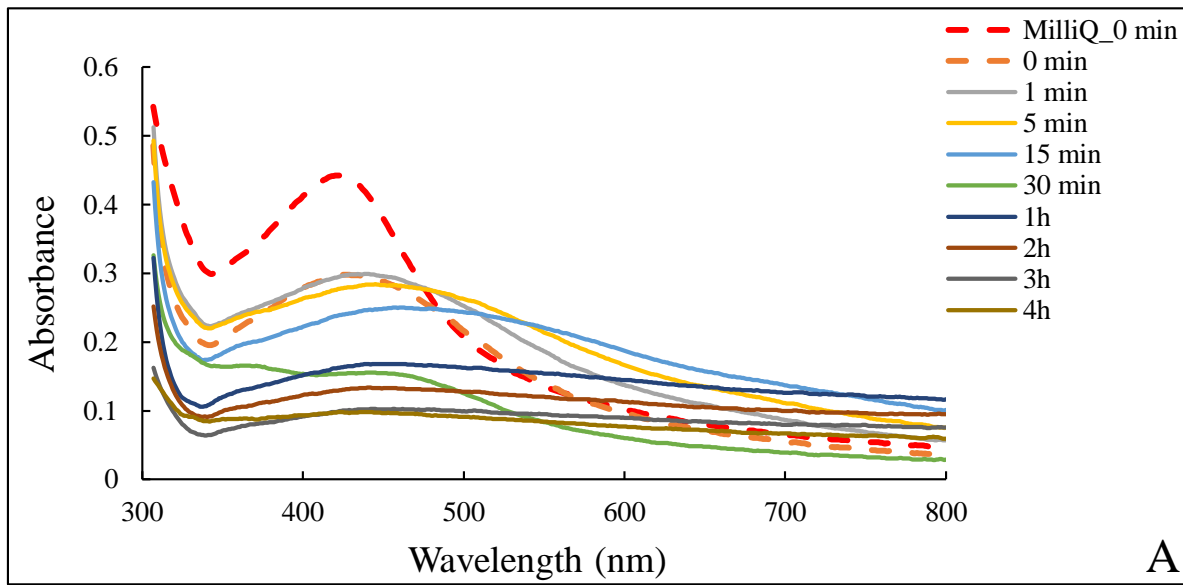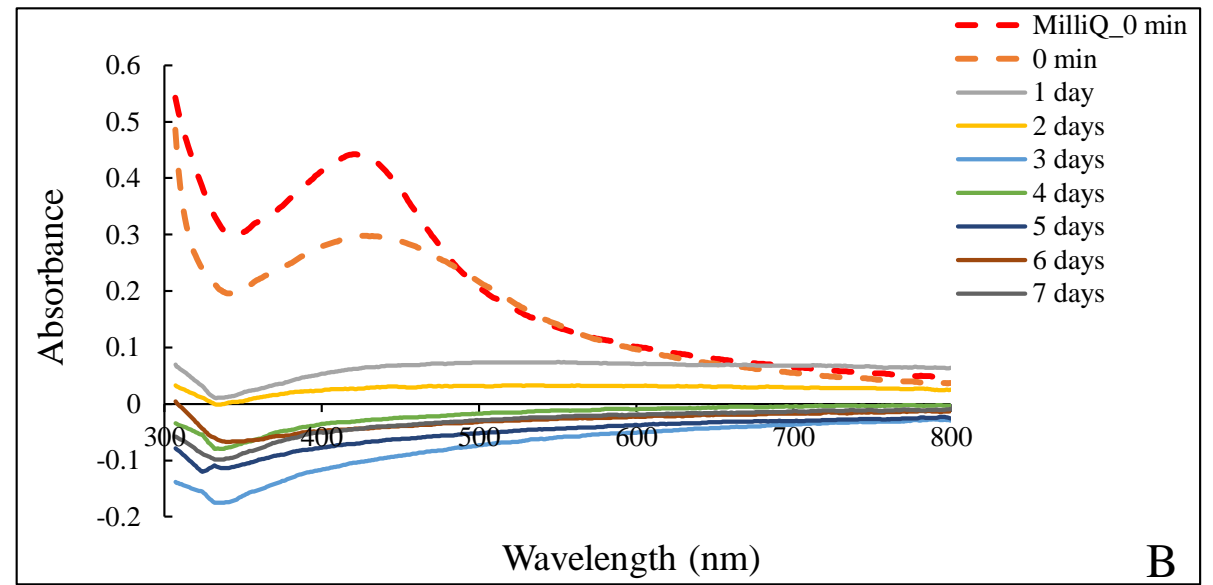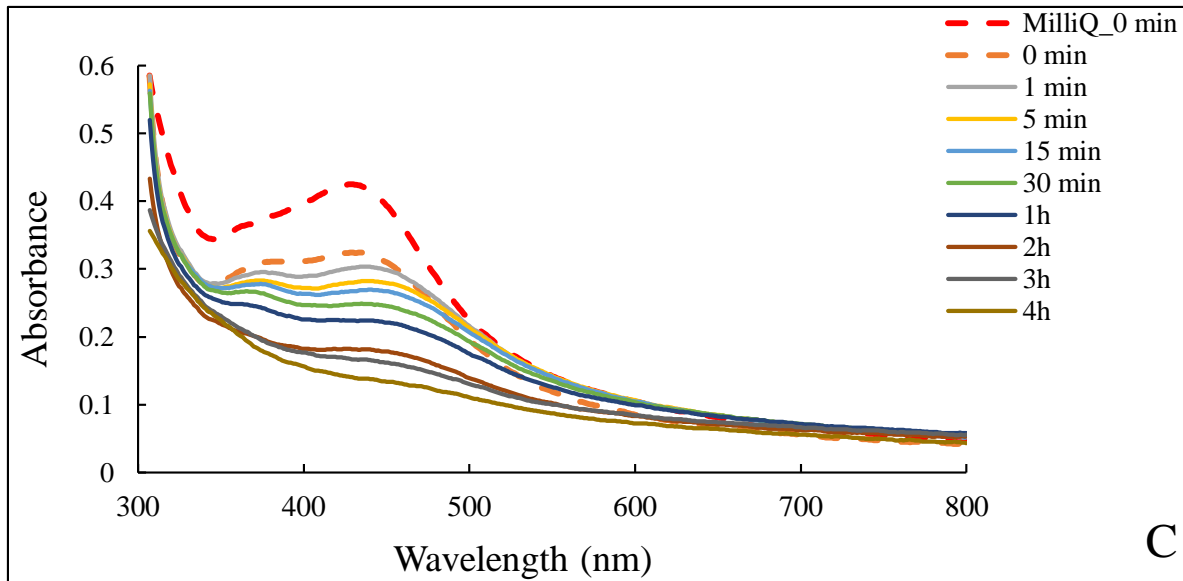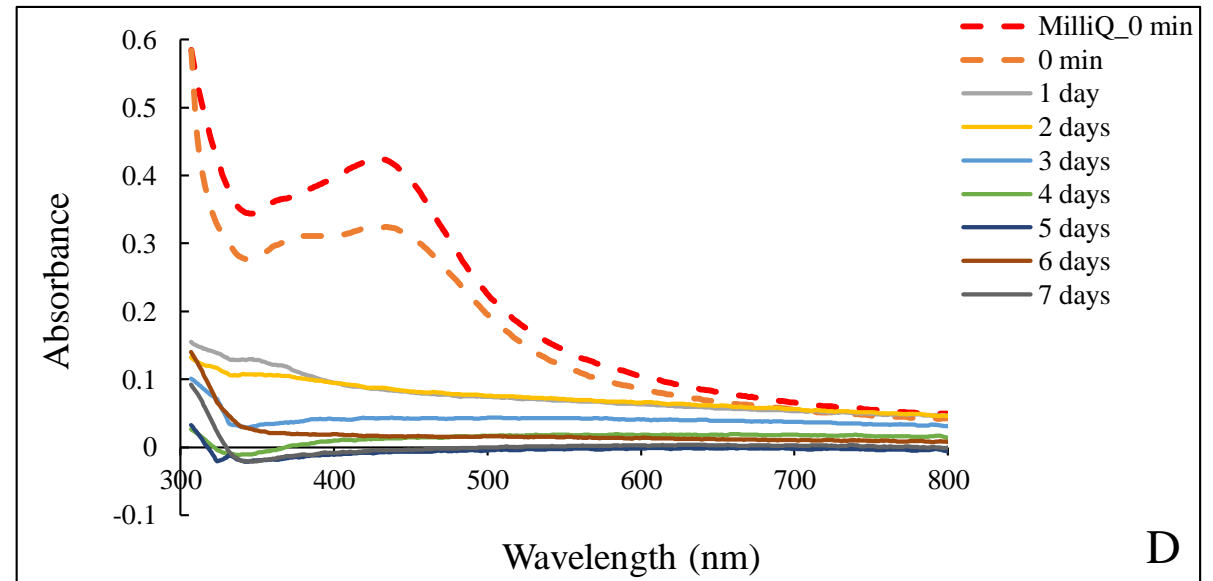

**Figure S2.** UV-Vis absorption spectra of 100  $\mu$ M AgNP-CTAB, alone (A, B) or in combination with 500  $\mu$ M cysteine (C, D), in a liquid  $\frac{1}{2}$  strength Murashige and Skoog (MS) medium, recorded over a period of 7 days.
