# Supplementary material for: Effects of Silver Nanoparticles on Physiological and Proteomic Responses of Tobacco (Nicotiana tabacum) Seedlings Are Coating-Dependent
Source: MDPI journal article supplement (doi:10.3390/ijms232415923), 2022-12-14
Supplement: s1 [file s1]

**Table S1.** Temporal changes in  $\zeta$  potential of 100  $\mu\text{M}$  AgNP-PVP and AgNP-CTAB in liquid  $\frac{1}{2}$  strength MS medium. Values are means  $\pm$  SD of five measurements.

|               | AgNP-PVP        | AgNP-CTAB      |
|---------------|-----------------|----------------|
| <b>0 min</b>  | $-11.2 \pm 0.8$ | $-7.0 \pm 2.7$ |
| <b>5 min</b>  | $-8.7 \pm 1.4$  | $-4.9 \pm 0.5$ |
| <b>30 min</b> | $-12.7 \pm 0.2$ | $-5.3 \pm 2.4$ |
| <b>4 h</b>    | $-12.1 \pm 0.7$ | $-5.2 \pm 0.5$ |
