# Supplementary material for: Effects of Silver Nanoparticles on Physiological and Proteomic Responses of Tobacco (Nicotiana tabacum) Seedlings Are Coating-Dependent
Source: Int J Mol Sci. 2022 Dec 14;23(24):15923. doi: 10.3390/ijms232415923 (PMC9787911; doi:10.3390/ijms232415923)
Supplement: Supplementary file 1 [file ijms-23-15923-s001.zip]

Archive with 6 entries (6 files):
- Figure S1_AgNP-PVP stability_revised.pdf
- Figure S2_AgNP-CTAB stability_revised.pdf
- Figure S3_DLS temporal analysis_AgNP-PVP.pdf
- Figure S4_DLS temporal analysis_AgNP-CTAB.pdf
- Figure S5_2DE gels.pdf
- Table S1_zeta potential analysis_revised.pdf
